# Supplementary material for: Alginate modified nanostructured calcium carbonate with enhanced delivery efficiency for gene and drug delivery
Source: Royal Society of Chemistry journal article supplement (doi:10.1039/c1mb05337j), 2011-12-12
Supplement: c1mb05337j.pdf [file c1mb05337j.pdf]

## Supporting Information

### **Alginate modified nanostructured calcium carbonate with enhanced delivery efficiency for gene and drug delivery**

Dong Zhao, Ren-Xi Zhuo, and Si-Xue Cheng\*

*Key Laboratory of Biomedical Polymers of Ministry of Education, Department of Chemistry, Wuhan University, Wuhan 430072, P. R. China.*

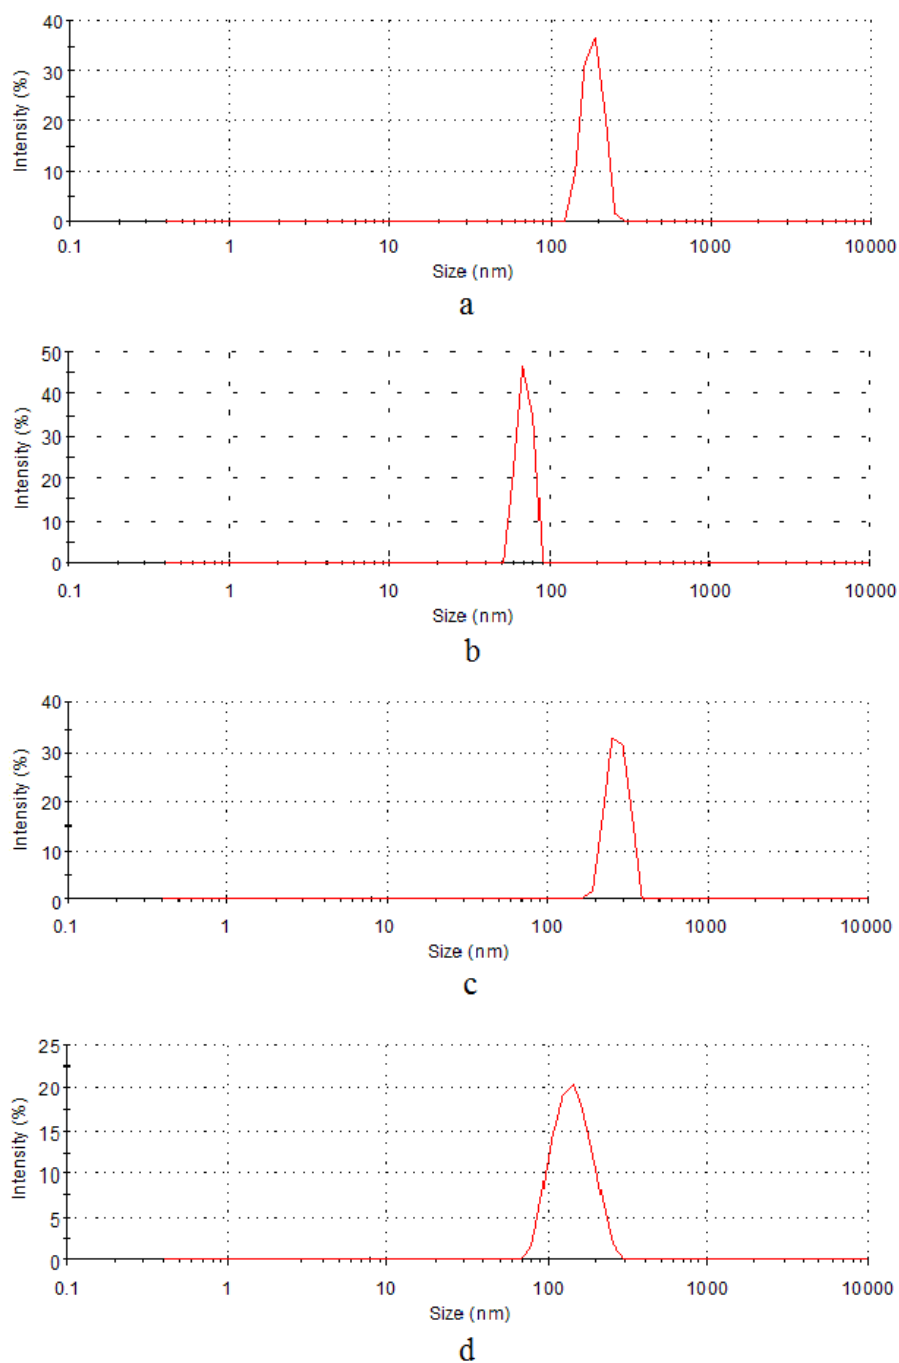

FigureS1. The particle size distributions of different nanoparticles: (a) freshly prepared  $\text{CaCO}_3/\text{DNA}$  with  $\text{Ca}^{2+}/\text{CO}_3^{2-}$  ratio of 50, (b) freshly prepared alginate/ $\text{CaCO}_3/\text{DNA}$  with  $\text{Ca}^{2+}/\text{CO}_3^{2-}$  ratio of 50 and alginate amount of 1  $\mu\text{g}$ , (c)  $\text{CaCO}_3/\text{DNA}$  with  $\text{Ca}^{2+}/\text{CO}_3^{2-}$  ratio of 50 after storage at 37  $^\circ\text{C}$  for 4 h, and (d) alginate/ $\text{CaCO}_3/\text{DNA}$  with  $\text{Ca}^{2+}/\text{CO}_3^{2-}$  ratio of 50 and alginate amount of 1  $\mu\text{g}$  after storage at 37  $^\circ\text{C}$  for 4 h.

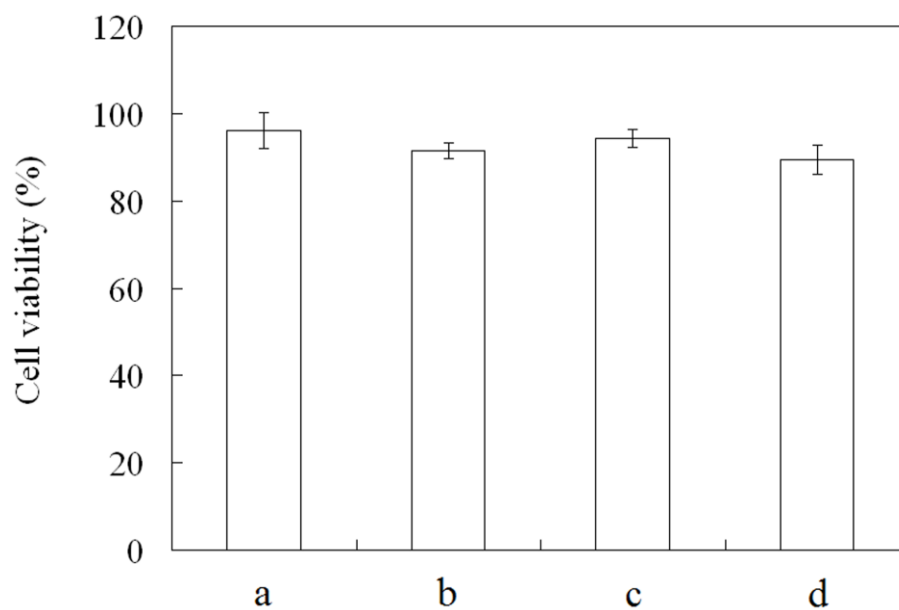

Figure S2. Cell viability of 293T cells after transfection for 48 h mediated by different nanoparticles: (a)  $\text{CaCO}_3/\text{DNA}$  with  $\text{Ca}^{2+}/\text{CO}_3^{2-}$  ratio of 50, (b) alginate/ $\text{CaCO}_3/\text{DNA}$  with  $\text{Ca}^{2+}/\text{CO}_3^{2-}$  ratio of 50 and alginate amount of 1  $\mu\text{g}$ , (c)  $\text{CaCO}_3/\text{DNA}$  with  $\text{Ca}^{2+}/\text{CO}_3^{2-}$  ratio of 100, and (d) alginate/ $\text{CaCO}_3/\text{DNA}$  with  $\text{Ca}^{2+}/\text{CO}_3^{2-}$  ratio of 100 and alginate amount of 1  $\mu\text{g}$ . The nanoparticles used for transfection were freshly prepared.
